# Supplementary material for: Polish Nurses’ Attitude to e-Health Solutions and Self-Assessment of Their IT Competence
Source: MDPI journal article supplement (doi:10.3390/jcm10204799), 2021-10-19
Supplement: s1 [file s1]

## Survey questionnaire

### Nurses' Attitude to E-health Solutions and Self-assessment of their IT Competences

Socio-demographic data of survey nurses:

Age.....

Level of education:

- ☐ Medical secondary education
- ☐ Bachelor's degree
- ☐ Master's degree

Additional qualification

☐ Yes

☐ No

Place of work

- ☐ Hospital
- ☐ Primary Health Care
- ☐ Private sector
- ☐ Outpatient Specialist Care

### The frequency of using the internet and the electronic devices by nurses in private life and at work

How often do you use the Internet?

- ☐ Several times a day
- ☐ Every day
- ☐ Several times a week
- ☐ Once a week
- ☐ I don't use it

|          | In private life |           |       |                | At work  |       |           |       |                |
|----------|-----------------|-----------|-------|----------------|----------|-------|-----------|-------|----------------|
|          | Often           | Sometimes | Never | Not applicable |          | Often | Sometimes | Never | Not applicable |
| Computer |                 |           |       |                | Computer |       |           |       |                |

|             |  |  |  |  |             |  |  |  |  |
|-------------|--|--|--|--|-------------|--|--|--|--|
| Tablet      |  |  |  |  | Tablet      |  |  |  |  |
| Smartphone  |  |  |  |  | Smartphone  |  |  |  |  |
| E-mail      |  |  |  |  | E-mail      |  |  |  |  |
| Mobile Apps |  |  |  |  | Mobile Apps |  |  |  |  |

### IT competences - Nurses' opinion on IT competences and the education in this field

Please evaluate your skills in using these devices / solutions and the Internet:

- ☐ Very good
- ☐ Good
- ☐ Sufficient
- ☐ Weak
- ☐ Very weak

| Item                                                                            | Yes | Rather yes | I do not have opinion | Rather no | No |
|---------------------------------------------------------------------------------|-----|------------|-----------------------|-----------|----|
| I feel prepared to use e-health solutions in my work                            |     |            |                       |           |    |
| I would use training courses to improve my IT competences                       |     |            |                       |           |    |
| Current nursing education keeps pace with the challenges of the 21st century.   |     |            |                       |           |    |
| The nursing training program should better prepare for acquiring IT competences |     |            |                       |           |    |

### Recommendation of e-health solution section

**Types of e-health solutions recommended by nurses:**

| Recommended e-health solutions                                                            | I recommend now | I would recommend | I do not recommend |
|-------------------------------------------------------------------------------------------|-----------------|-------------------|--------------------|
| Remote monitoring of basic parameters (pressure, heart rate, temperature, glucose level). |                 |                   |                    |
| Laboratory test results via the Internet                                                  |                 |                   |                    |
| Arranging medical appointments via the Internet                                           |                 |                   |                    |
| Using a mobile application that facilitates research analysis                             |                 |                   |                    |
| Using a mobile application that is a knowledge base on health-related topics              |                 |                   |                    |

|                                                                               |  |  |  |
|-------------------------------------------------------------------------------|--|--|--|
| Using a mobile application that is a mobile drug database                     |  |  |  |
| Using a mobile application that reminds to take medication                    |  |  |  |
| Using video-consultation with a doctor/nurse to support the treatment process |  |  |  |

#### Assessment of e-health solutions section

##### Nurses' opinions on the use of e-health solutions in the health care sector:

| Types of e-health solutions                                                                                                        | Strongly relevant | Relevant | I have no opinion | Irrelevant | Completely irrelevant |
|------------------------------------------------------------------------------------------------------------------------------------|-------------------|----------|-------------------|------------|-----------------------|
| Easy and quick access to patients' medical records                                                                                 |                   |          |                   |            |                       |
| Possibility to write electronic prescriptions                                                                                      |                   |          |                   |            |                       |
| Possibility to write out electronic sick leaves                                                                                    |                   |          |                   |            |                       |
| Possibility to write electronic referrals                                                                                          |                   |          |                   |            |                       |
| Using the electronic database of drugs                                                                                             |                   |          |                   |            |                       |
| Ability to remotely route patients to other specialists or hospitals                                                               |                   |          |                   |            |                       |
| Solutions to streamline the sending / sharing of clinical results                                                                  |                   |          |                   |            |                       |
| Solutions enabling remote (not requiring direct contact) patient care                                                              |                   |          |                   |            |                       |
| Increasing the share of digital solutions supporting the treatment and self-monitoring of the patient's health                     |                   |          |                   |            |                       |
| The ability to exercise comprehensive control over the facility and track generated costs, staff management (schedules, schedules) |                   |          |                   |            |                       |
| Possibility to conduct scientific research                                                                                         |                   |          |                   |            |                       |

##### Nurses' opinions on the presence of new technologies in the life of modern people

- ☐ It fascinate me
- ☐ It interest me
- ☐ It is helpfull
- ☐ I have no opinion
- ☐ It worries me
- ☐ It scares me

***Thank you for participating in the survey***
